# CoViD-19 outbreak in Northern Italy: Did particulate matter really play a key role?

**Maria Cristina Collivignarelli**

Department of Civil Engineering and Architecture

University of Pavia

via Ferrata 1, 27100 Pavia, Italy

Interdepartmental Centre for Water Research

University of Pavia

via Ferrata 3, 27100 Pavia, Italy

[mcristina.collivignarelli@unipv.it](mailto:mcristina.collivignarelli@unipv.it)

**Alessandro Abbà**

Department of Civil, Environmental, Architectural Engineering and Mathematics

University of Brescia

via Branze 43, 25123 Brescia, Italy

[alessandro.abba@unibs.it](mailto:alessandro.abba@unibs.it)

**Francesca Maria Caccamo**

Department of Civil Engineering and Architecture

University of Pavia

via Ferrata 1, 27100 Pavia, Italy

[francescamaria.caccamo01@universitadipavia.it](mailto:francescamaria.caccamo01@universitadipavia.it)

**Giorgio Bertanza**

Department of Civil, Environmental, Architectural Engineering and Mathematics

University of Brescia

via Branze 43, 25123 Brescia, Italy

[giorgio.bertanza@unibs.it](mailto:giorgio.bertanza@unibs.it)

**NOTE: This preprint reports new research that has not been certified by peer review and should not be used to guide clinical practice.**

30  
31  
32  
33  
34  
35  
36  
37  
38  
39  
40  
41  
42  
43  
44  
45  
46  
47  
48  
49  
50  
51  
52  
53  
54  
55

**Roberta Pedrazzani**

Department of Mechanical and Industrial Engineering

University of Brescia

via Branze 38, I-25123, Brescia, Italy

[roberta.pedrazzani@unibs.it](mailto:roberta.pedrazzani@unibs.it)

**Marco Baldi**

Department of Chemistry

University of Pavia

viale Taramelli 10, 27100 Pavia, Italy

[marco.baldi@unipv.it](mailto:marco.baldi@unipv.it)

**Paola Ricciardi**

Department of Civil Engineering and Architecture

University of Pavia

via Ferrata 1, 27100 Pavia, Italy

[paola.ricciardi@unipv.it](mailto:paola.ricciardi@unipv.it)

**Marco Carnevale Miino (\*)**

(Corresponding author)

Department of Civil Engineering and Architecture

University of Pavia

via Ferrata 1, 27100 Pavia, Italy

[marco.carnevalemiino01@universitadipavia.it](mailto:marco.carnevalemiino01@universitadipavia.it)

# CoViD-19 outbreak in Northern Italy: Did particulate matter really play a key role?

Maria Cristina Collivignarelli <sup>1,2</sup>, Alessandro Abbà <sup>3</sup>, Francesca Maria Caccamo <sup>1</sup>, Giorgio Bertanza <sup>3</sup>,  
Roberta Pedrazzani <sup>4</sup>, Marco Baldi <sup>5</sup>, Paola Ricciardi <sup>1</sup>, Marco Carnevale Miino <sup>1,\*</sup>

<sup>1</sup>: Department of Civil Engineering and Architecture, University of Pavia, via Ferrata 1, 27100 Pavia, Italy

<sup>2</sup>: Interdepartmental Centre for Water Research, University of Pavia, via Ferrata 3, 27100 Pavia, Italy

<sup>3</sup>: Department of Civil, Environmental, Architectural Engineering and Mathematics, University of Brescia, via Branze 43, 25123 Brescia, Italy

<sup>4</sup>: Department of Mechanical and Industrial Engineering, University of Brescia, via Branze 38, I-25123, Brescia, Italy

<sup>5</sup>: Department of Chemistry, University of Pavia, viale Taramelli 10, 27100 Pavia, Italy

\*: Corresponding author -> Email address: marco.carnevalemiino01@universitadipavia.it (Marco Carnevale Miino)

## Abstract:

Northern Italian regions have been the most affected from CoViD-19 compared to other Italian areas and are also the zones where air pollutants concentration has been higher than in the rest of Italy. The aim of the research is analysing possible correlations between air pollutants PM<sub>10</sub> and PM<sub>2.5</sub> and the rapidity of the spread of the infection caused by CoViD-19 in Northern Italy. PM<sub>10</sub> and PM<sub>2.5</sub> data for all the 41 studied cities were collected from the local environmental protection agencies. In order to compare air quality data with epidemiological data (T<sub>d</sub>), a statistical analysis was conducted identifying the correlation matrices of Pearson and Spearman, considering the possible incubation period of the disease. The results exclude a strong direct correlation between PM in the air and the diffusion rate of CoViD-19. Further developments are necessary for a better comprehension of the influence of atmospheric pollution parameters on the rapidity of spread of the virus SARS-CoV-2, since a synergistic action with other factors, such as meteorological factors, could not be excluded.

**Keywords:** PM<sub>10</sub>; PM<sub>2.5</sub>; SARS-CoV-2; doubling time; virus; air quality

## 1. Introduction

Northern Italy, which has been the most affected area by coronavirus disease (CoViD-19) (INCP, 2020), is also the portion of the Country with the highest amount of atmospheric particulate matter (PM) often exceeding the legislative limit. Moreover, together with Poland and Bulgaria, Northern Italy has the worst air quality in Europe in terms of PM (EEA, 2019, 2018, 2017).

PM is a mixture of solid and liquid particles in the air. Based on its size, PM can be classified into three categories: coarse (2.5–10 $\mu$ m), fine (<2.5 $\mu$ m), and ultrafine (<0.1 $\mu$ m) (Ciencewicki and Jaspers, 2007). Several studies confirmed a strong correlation between air particulate pollution and the increase of respiratory diseases (Cruz-Sanchez et al., 2013; Horne et al., 2018; Xu et al., 2016; Zhou et al., 2015).

The Italian Society of Environmental Medicine (SIMA) (SIMA, 2020) supposed for the first time a possible correlation between the great diffusion of CoViD-19 in Northern Italy and the high concentrations of PM<sub>10</sub> and PM<sub>2.5</sub> considering the atmospheric particulate matter as a vector that could transport SARS-CoV-2 (Setti et al., 2020b, 2020a). Several other authors supposed that PM could acts as a support for novel SARS coronavirus (SARS-CoV-2), allowing the spread and the transport even for significant distances. As reported in these studies, PM may represent a substrate that allows the virus to remain in the air in a contagious form for hours or days, promoting its diffusion (Sanità di Toppi et al., 2020; SIMA, 2020). Many studies have been carried out on the association between the concentration of different air pollutants (i.e. PM<sub>2.5</sub>, PM<sub>10</sub>, SO<sub>2</sub>, CO, NO<sub>2</sub>, and O<sub>3</sub>) in the air and the proliferation and aggressiveness of the novel coronavirus infection (Coccia, 2020; Liu et al., 2020; Yari and Moshhammer, 2020; Zhu et al., 2020).

This study aims to explore the relationship between ambient air pollutants PM<sub>10</sub> and PM<sub>2.5</sub> and the rapidity of the spread of the infection caused by CoViD-19 in Northern Italy, where air pollutants concentration is higher than in the rest of Italy. Data on particulate matter (PM<sub>10</sub> and PM<sub>2.5</sub>) were analysed and, considering an incubation time of 10 - 15 d, were compared with the CoViD-19 rapidity of spread, evaluated using the doubling time (T<sub>d</sub>), in 41 cities of Northern Italy. In order to compare air quality data with epidemiological data, a statistical analysis was conducted.

## 2. Methods

### 2.1. Area of the study

Considering that CoViD-19 has broken out in Northern Italy, this part of the Country has been selected in order to detect a possible correlation between epidemic spread and PM in air. According to the most recent available data (1.1.2020), the area of the study was larger than 100,000 km<sup>2</sup> (ISTAT, 2020a) and divided in 41 provinces in seven

different Regions (Piedmont, Valle d'Aosta, Lombardy, Liguria, Veneto, Trentino, and Emilia Romagna). The analysis has been applied on the capital of each province, totally accounting for around 25.8 million of inhabitants (ISTAT, 2020b). In Fig. 1, the map of the selected provinces and the location of capital cities are reported.

## **FIGURE 1**

### **2.2 Epidemiological data collection and processing**

The epidemiological evolution of the new SARS-CoV-2 cases was not available at city-level. Therefore, the epidemiological data referred to each single province, provided by the Italian National Civil Protection (INCP, 2020), were considered. In order to compare the spread of the CoViD-2019, the new cases in the selected periods of CoViD-19 outbreak were fitted with exponential curve (Eq. 1) aiming to quantify the  $T_d$  (Eq. 2):

$$I[\text{cases}] = I_0 + a_1 * e^{\frac{t}{a_2}} \quad (1)$$

$$T_d[d] = a_2 * \ln(2) \quad (2)$$

Where  $I$  represents the number of new infections, and  $t$  is the time from the first proclaimed case in the province [d].

### **2.3. Particulate matter data collection and processing**

The particulate matter, with a diameter of  $<10 \mu\text{m}$  ( $\text{PM}_{10}$ ) and  $2.5 \mu\text{m}$  ( $\text{PM}_{2.5}$ ), data for all cities, were collected from the local environmental protection agencies (APPA Trento, 2020; ARPA Emilia-Romagna, 2020; ARPA Liguria, 2020; ARPA Lombardia, 2020; ARPA Piemonte, 2020; ARPA Valle d'Aosta, 2020; ARPA Veneto, 2020). All air quality control units, located in the capital cities, which measured particulate matters were selected and employed (Table S1) in the selected periods. Forlì and Cesena are co-capitals of their province and were considered as a single city. Data of  $\text{PM}_{2.5}$  in Belluno, Ferrara and Reggio Emilia were not available. The daily averages (24 h) of the air pollutants for each city were calculated with the median, the standard deviation and the confidence interval.

### **2.4. Comparison of the data**

In order to compare air quality data ( $\text{PM}_{10}$  and  $\text{PM}_{2.5}$ ) with epidemiological data ( $T_d$ ), a statistical analysis was conducted in order to identify the correlation matrices of Pearson and Spearman. Moreover, three different fittings (linear, quadratic and cubic) were used to investigate a correlation between the CoVid-19 spread rapidity in Northern Italy and particulate matter.

### **2.5. Determination of periods**

The choice of the periods determined to select the epidemiological and the air quality data has been made considering the average incubation time of the SARS-CoV-2 in order to evaluate the actual period, during which contagion among people might occur. Several studies determined that the incubation time could be up to 10 - 15 d (Backer et al., 2020; Lai et al., 2020; Li et al., 2020). Therefore, while epidemiological data were considered from the day on which the first person infected in each province was identified, the air quality period was chosen in such a way that it was anticipated by 15 d. In the 8<sup>th</sup> March, 2020 several restrictions were imposed in part of Northern Italy and in 9<sup>th</sup> March, 2020 they were extended at the rest of the Country (DPCM, 2020a, 2020b). Following the further increase in the number of infections, the restrictions were made even more severe starting from March 11<sup>th</sup>, 2020 (DPCM, 2020c). In order to study only the exponential tract of the epidemiological curve, no data after the 18<sup>th</sup> March 2020 were considered (Fig. 2). In some red areas (around the city of Lodi) the restrictions have been imposed earlier than in the rest of the region. The different lockdown timing could have direct repercussions on the epidemiological curve and therefore in Lodi, the selected period ended in 1 March, 2020 (IMH, 2020a, 2020b). In Bergamo and Lecco, the influence due to lockdown were already visible before the 18<sup>th</sup> March 2020. In these cases, the selected periods were shortened.

The air quality data of PM<sub>10</sub> and PM<sub>2.5</sub> were analysed since the 15 day before the date of the first confirmed infection up to the partial lockdown date of 8 March (DPCM, 2020a), as showed in Fig.2. The choice of the period for determine the air quality was made considering the potential incubation time of the novel coronavirus around 14 days (as a maximum precautionary limit) and the restriction imposed on March 8 to evaluate the real period in which there was possible contagion among people.

## **FIGURE 2**

### **3. Results and discussion**

#### **3.1. Epidemiological analysis**

Fitting the epidemiological data of total infection by an exponential curve (Fig. 3 – Tab. S2), the  $T_d$  has been calculated for each city considered in the study (Fig.4). This value varied significantly. Asti and Piacenza showed the higher  $T_d$ , 14.9 d and 10.7 d respectively, representing a slower spread of the CoViD-19 infection among the population. On the contrary, other cities such as Lodi, Aosta, Novara and Turin were characterized by a  $T_d$  fewer than 2.5 d. In these cases, the transmission of the virus among the population was faster. As expected, the minor  $T_d$  (1.2 d) belongs to Lodi which was the first area of contagion and outbreak of the CoViD-19 in Italy. The  $T_d$  obtained in this study are in accordance with other results reported in scientific literature. D'Arienzo and Coniglio (2020) identify  $T_d$  equals to 3.1 d for Italy in the period February 25<sup>th</sup>–March 12<sup>th</sup>, 2020. In the period February 20<sup>th</sup>- March 24<sup>th</sup>, in the Italian regions of Lombardy

and Emilia Romagna, Riccardo et al. (2020) evaluated  $T_d$  equals to 2.7 d. Setti et al. (2020b) highlighted that in Milan, before March 13<sup>th</sup>,  $T_d$  was 2.0 d.

### **FIGURE 3**

### **FIGURE 4**

## **3.2. Particulate matter**

In Figure 5, the average and median value of  $PM_{10}$  and  $PM_{2.5}$  in each city for the selected periods are shown. Among the 41 cities, Cremona, Lodi, Milan, Modena, Padua, Parma, Pavia, Rovigo, Turin, Treviso, Venice and Vicenza presented a mean value of  $PM_{10}$  above  $40 \mu g m^{-3}$ . The highest mean value of  $PM_{10}$   $48.8 \mu g m^{-3}$  was reached in Turin. A similar trend was observed for  $PM_{2.5}$ , where a concentration higher than  $30 \mu g m^{-3}$  was found in Cremona, Lodi, Monza, Padua, Pavia, Rovigo, Treviso, Venice and Vicenza. In this case, Padua showed the highest mean value of  $PM_{2.5}$  ( $37.4 \mu g m^{-3}$ ). On the contrary, the lowest mean values of  $PM_{10}$  and  $PM_{2.5}$ , was detected in Aosta, and were equal to  $13.8 \mu g m^{-3}$  and  $9.5 \mu g m^{-3}$ , respectively. Other areas with the low mean values of  $PM_{10}$  and  $PM_{2.5}$  were recorder in the seaside cities of Genoa ( $20.6 \mu g m^{-3}$  and  $11.8 \mu g m^{-3}$ , respectively), Savona ( $20.6 \mu g m^{-3}$  and  $12.5 \mu g m^{-3}$ , respectively), and La Spezia ( $21.2 \mu g m^{-3}$  and  $10.3 \mu g m^{-3}$ , respectively), also in this case probably due to weather conditions, such as wind and precipitation, that could have positively influenced the air quality. The concentration of atmospheric PM is highly sensitive to weather conditions and factors such as wind and precipitation can strongly influence its concentration in the air (Baklanov et al., 2016; Collivignarelli et al., 2020).

### **FIGURE 5**

## **3.3. Statistical analysis and discussion**

Air quality and epidemiological data were analysed in order to calculate the Pearson correlation and the Spearman correlation, to assess a possible dependence between the  $T_d$  of the spread of CoViD-19 among the population and the concentration of  $PM_{10}$  and  $PM_{2.5}$  in the weeks preceding the identification of the infection (Tab. 1). The results show no significant differences between the two correlations used even if Pearson's R are slightly higher for  $T_d$ - $PM_{10}$  and  $PM_{2.5}$ - $PM_{10}$ : 0.2485 and 0.8993, respectively. While, as confirmed by the literature (Andrée, 2020), a very strong positive correlation between  $PM_{10}$  and  $PM_{2.5}$  exists ( $R = 0.8993$  and  $0.8669$  with Pearson and Spearman, respectively) it is however evident that the correlation between PM and the doubling time of the number of infected people (inversely

proportional to propagation speed of the epidemic) is positive and substantially low. In fact, the indices of correlations given by Pearson and Spearman were 0.2485 and 0.1954, respectively.

In order to better study the behaviour of  $T_d$  as a function of  $PM_{10}$  and  $PM_{2.5}$ , these values have been fitted with linear, quadratic and cubic functions (Fig. 6). In the  $T_d - PM_{10}$  case, the function that best approximates the points is that of 3rd-degree ( $R^2 = 0.117$ ), while in the case of  $T_d - PM_{2.5}$  both the 2nd-degree function and the 3rd-degree function return the best  $R^2$  (0.109). Two aspects can be highlighted: (i) the 2nd- and 3rd-degree functions do not substantially improve the fitting of the points with respect to the linear function; (ii) in all cases the  $R^2$  values remain decidedly low in order to define the accurate fitting.

Although this study does not consider some factors, such as the possibility that a person may have become infected in a location other than that of residence, it compares the epidemiological and air quality data of 41 cities in Northern Italy in the most affected regions from CoViD-19, taking into account the possible incubation period of the disease. The results allow excluding a strong correlation between the diffusion rate of CoViD-19 and PM. Furthermore, it is interesting to note that the low correlation indices identified are both positive.

This result is only partially comparable with literature results, where in most cases the comparison of PM to the rate of infected people was assessed, instead of the rapidity of contagion, with the use of  $T_d$ . However, the opinion of the scientific community on the influence of  $PM_{10}$  on the infected population rate is conflicting. Other studies have instead obtained positive correlations between the number of infected, mortality and the concentration of PM in the air (Ma et al., 2020; Zhu et al., 2020). Anyway, the atmospheric pollution is univocally recognized as a crucial co-factor in worsening the initial health state, inducing the need of intensive care and hospitalization and causing lethality, due to impairment and weakening of the immune system, particularly in case of chronic exposures. Fine and ultrafine particulate matter, as well as ozone, nitrogen dioxide and sulphur dioxide produce a systemic inflammation (with an intense synthesis of proinflammatory cytokines) also in young and non-smoker people, thus deeply increasing the health risks; hypertension, cardiovascular diseases, chronic obstructive pulmonary diseases, diabetes can be listed among the effects caused by air pollution (Conticini et al., 2020; Fattorini and Regoli, 2020; Ogen, 2020).

On the other hand, it is becoming increasingly clear, also by following the epidemic trends worldwide, that several aspects should also be taken into account: focusing exclusively on air pollution can lead to spurious associations, because socio-economic and cultural factors often play a concurrent role. Andree (2020) presents a detailed analysis of the Dutch situation, by studying areas, hotspots, pollution loads, social links, habits, age, gender, household



composition, and lifestyle. In addition, the variability in healthcare systems and identification practices highly affect the data about pandemic behaviour.

# **TABLE 1**

# **FIGURE 6**

## **4. Conclusion**

In this work, data on the concentration of PM<sub>10</sub> PM<sub>2.5</sub> were analysed and, considering an incubation time of 10 - 15 d, were compared with the rapidity of spread of CoViD-19 in 41 cities of Northern Italy. Although this work allows to exclude a strong direct correlation between PM in the air and the diffusion rapidity of CoViD-19, the authors believe it is necessary to further comprehend the influence of atmospheric pollution parameters on the rapidity of spread of the virus SARS-CoV-2, since it cannot be excluded that a synergistic action with other factors, such as meteorological factors, could exist.

## **Declaration of competing interest**

The authors declare that they have no known competing financial interests or personal relationships that could have appeared to influence the work reported in this paper.

## **CRediT authorship contribution statement**

**Maria Cristina Collivignarelli:** Conceptualization, Methodology, Supervision, Validation, Writing. **Alessandro Abbà:** Methodology, Validation, Visualization, Writing. **Francesca Maria Caccamo:** Data curation and formal analysis, Writing. **Giorgio Bertanza:** Methodology, Validation, Writing. **Roberta Pedrazzani:** Data curation and formal analysis, Validation, Writing. **Marco Baldi:** Visualization, Validation **Paola Ricciardi:** Visualization, Writing. **Marco Carnevale Miino:** Conceptualization, Data curation and formal analysis, Methodology, Supervision, Validation, Writing.

## **References**

- APPA Trento, 2020. Data of Air Quality in Northern Italy (in Italian) [WWW Document]. URL <http://www.appa.provincia.tn.it/aria/> (accessed 5.25.20).
- Andrée, B.P.J., 2020. Incidence of Covid-19 and Connections with Air Pollution Exposure: Evidence from the Netherlands (No. 9221).

- 247 APPA Trento, 2020. Data of Air Quality in Trentino (in Italian) [WWW Document].
- 248 ARPA Emilia-Romagna, 2020. Data of Air Quality in Emilia-Romagna (in Italian) [WWW Document].
- 249 ARPA Liguria, 2020. Data of Air Quality in Liguria Italy (in Italian) [WWW Document].
- 250 ARPA Lombardia, 2020. Data of Air Quality in Lombardia (in Italian) [WWW Document].
- 251 ARPA Piemonte, 2020. Data of Air Quality in Piemonte (in Italian) [WWW Document].
- 252 ARPA Valle d'Aosta, 2020. Data of Air Quality in Valle D'aosta (in Italian) [WWW Document].
- 253 ARPA Veneto, 2020. Data of Air Quality in Veneto (in Italian) [WWW Document]. URL
- 254 <https://www.arpa.veneto.it/temi-ambientali/aria> (accessed 4.25.20).
- 255 Backer, J.A., Klinkenberg, D., Wallinga, J., 2020. Incubation period of 2019 novel coronavirus (2019-nCoV) infections
- 256 among travellers from Wuhan, China, 20–28 January 2020. *Eurosurveillance* 25. [https://doi.org/10.2807/1560-](https://doi.org/10.2807/1560-7917.ES.2020.25.5.2000062)
- 257 [7917.ES.2020.25.5.2000062](https://doi.org/10.2807/1560-7917.ES.2020.25.5.2000062)
- 258 Baklanov, A., Molina, L.T., Gauss, M., 2016. Megacities, air quality and climate. *Atmos. Environ.* 126, 235–249.
- 259 <https://doi.org/10.1016/j.atmosenv.2015.11.059>
- 260 Ciencewicky, J., Jaspers, I., 2007. Air pollution and respiratory viral infection. *Inhal. Toxicol.* 19, 1135–1146.
- 261 <https://doi.org/10.1080/08958370701665434>
- 262 Coccia, M., 2020. Factors determining the diffusion of COVID-19 and suggested strategy to prevent future accelerated
- 263 viral infectivity similar to COVID. *Sci. Total Environ.* 729, 138474.
- 264 <https://doi.org/10.1016/j.scitotenv.2020.138474>
- 265 Collivignarelli, M.C., Abbà, A., Bertanza, G., Pedrazzani, R., Ricciardi, P., Carnevale Miino, M., 2020. Lockdown for
- 266 CoViD-2019 in Milan: What are the effects on air quality? *Sci. Total Environ.* 732, 139280.
- 267 <https://doi.org/10.1016/j.scitotenv.2020.139280>
- 268 Conticini, E., Frediani, B., Caro, D., 2020. Can atmospheric pollution be considered a co-factor in extremely high level
- 269 of SARS-CoV-2 lethality in Northern Italy? *Environ. Pollut.* 261, 114465.
- 270 <https://doi.org/10.1016/j.envpol.2020.114465>
- 271 Cruz-Sanchez, T.M., Haddrell, A.E., Hackett, T.L., Singhera, G.K., Marchant, D., Lekivetz, R., Meredith, A., Horne,
- 272 D., Knight, D.A., Van Eeden, S.F., Bai, T.R., Hegele, R.G., Dorscheid, D.R., Agnes, G.R., 2013. Formation of a

273 stable mimic of ambient particulate matter containing viable infectious respiratory syncytial virus and its dry-  
274 deposition directly onto cell cultures. *Anal. Chem.* 85, 898–906. <https://doi.org/10.1021/ac302174y>

275 D'Arienzo, M., Coniglio, A., 2020. Assessment of the SARS-CoV-2 basic reproduction number, R0, based on the early  
276 phase of COVID-19 outbreak in Italy. *Biosaf. Heal.* 3–5. <https://doi.org/10.1016/j.bsheal.2020.03.004>

277 DPCM, 2020a. Decree of the President of the Council of Ministers of the Italian Republic of March 8, 2020 - Further  
278 implementing provisions of the decree-law of 23 February 2020, n. 6, containing urgent measures regarding the  
279 containment and management of the epidemio. President of the Council of Ministers of the Italian Republic,  
280 Rome, Italy.

281 DPCM, 2020b. Decree of the President of the Council of Ministers of the Italian Republic of March 9, 2020 - Further  
282 implementing provisions of the decree-law of 23 February 2020, n. 6, containing urgent measures regarding the  
283 containment and management of the epidemio. President of the Council of Ministers of the Italian Republic,  
284 Rome, Italy.

285 DPCM, 2020c. Decree of the President of the Council of Ministers of the Italian Republic of March 11, 2020 - Further  
286 implementing provisions of the decree-law of February 23, 2020, n. 6, containing urgent measures regarding the  
287 containment and management of the epidem. President of the Council of Ministers of the Italian Republic, Rome,  
288 Italy.

289 EEA, 2019. Air quality in Europe - 2019 report. Copenhagen.

290 EEA, 2018. Air quality in Europe - 2018 report. Copenhagen.

291 EEA, 2017. Air quality in Europe - 2017 report. Copenhagen.

292 Fattorini, D., Regoli, F., 2020. Role of the chronic air pollution levels in the Covid-19 outbreak risk in Italy. *Environ.*  
293 *Pollut.* 264, 114732. <https://doi.org/10.1016/j.envpol.2020.114732>

294 Horne, B.D., Joy, E.A., Hofmann, M.G., Gesteland, P.H., Cannon, J.B., Lefler, J.S., Blagev, D.P., Kent Korgenski, E.,  
295 Torosyan, N., Hansen, G.I., Kartchner, D., Arden Pope, C., 2018. Short-term elevation of fine particulate matter  
296 air pollution and acute lower respiratory infection. *Am. J. Respir. Crit. Care Med.* 198, 759–766.  
297 <https://doi.org/10.1164/rccm.201709-1883OC>

298 IMH, 2020a. Ordinance February 21, 2020. Italian Ministry of Health, Milan.

299 IMH, 2020b. Ordinance February, 23 2020 - Urgent measures for the containment and management of the  
300 epidemiological emergency from COVID-19. Lombardy region (In Italian). Italian Ministry of Health, Milan,  
301 Rome.

302 INCP, 2020. Department of Civil Protection COVID-19 in Italy - Monitoring of the situation [WWW Document]. Ital.  
303 Natl. Civ. Prot. URL  
304 <http://opendatadpc.maps.arcgis.com/apps/opsdashboard/index.html#/b0c68bce2cce478eaac82fe38d4138b1>  
305 (accessed 5.10.20).

306 ISTAT, 2020a. Surfaces of statistical administrative units - The surface of Italian Municipalities, Provinces and Regions  
307 in 9 October 2011 [WWW Document]. URL <https://www.istat.it/it/archivio/82599> (accessed 5.30.20).

308 ISTAT, 2020b. Resident population in Italy on 1st January [WWW Document]. URL  
309 [http://dati.istat.it/Index.aspx?DataSetCode=DCIS\\_POPRES1](http://dati.istat.it/Index.aspx?DataSetCode=DCIS_POPRES1) (accessed 5.30.20).

310 Lai, C.-C., Liu, Y.H., Wang, C.-Y., Wang, Y.-H., Hsueh, S.-C., Yen, M.-Y., Ko, W.-C., Hsueh, P.-R., 2020.  
311 Asymptomatic carrier state, acute respiratory disease, and pneumonia due to severe acute respiratory syndrome  
312 coronavirus 2 (SARS-CoV-2): Facts and myths. *J. Microbiol. Immunol. Infect.* 53, 404–412.  
313 <https://doi.org/10.1016/j.jmii.2020.02.012>

314 Li, Q., Guan, X., Wu, P., Wang, X., Zhou, L., Tong, Y., Ren, R., Leung, K.S.M., Lau, E.H.Y., Wong, J.Y., Xing, X.,  
315 Xiang, N., Wu, Y., Li, C., Chen, Q., Li, D., Liu, T., Zhao, J., Liu, M., Tu, W., Chen, C., Jin, L., Yang, R., Wang,  
316 Q., Zhou, S., Wang, R., Liu, H., Luo, Y., Liu, Y., Shao, G., Li, H., Tao, Z., Yang, Y., Deng, Z., Liu, B., Ma, Z.,  
317 Zhang, Y., Shi, G., Lam, T.T.Y., Wu, J.T., Gao, G.F., Cowling, B.J., Yang, B., Leung, G.M., Feng, Z., 2020.  
318 Early Transmission Dynamics in Wuhan, China, of Novel Coronavirus–Infected Pneumonia. *N. Engl. J. Med.*  
319 382, 1199–1207. <https://doi.org/10.1056/NEJMoa2001316>

320 Liu, J., Zhou, J., Yao, J., Zhang, X., Li, L., Xu, X., He, X., Wang, B., Fu, S., Niu, T., Yan, J., Shi, Y., Ren, X., Niu, J.,  
321 Zhu, W., Li, S., Luo, B., Zhang, K., 2020. Impact of meteorological factors on the COVID-19 transmission: A  
322 multi-city study in China. *Sci. Total Environ.* 726, 138513. <https://doi.org/10.1016/j.scitotenv.2020.138513>

323 Ma, Y., Zhao, Y., Liu, J., He, X., Wang, B., Fu, S., Yan, J., Niu, J., Zhou, J., Luo, B., 2020. Effects of temperature  
324 variation and humidity on the death of COVID-19 in Wuhan, China. *Sci. Total Environ.* 724, 138226.  
325 <https://doi.org/10.1016/j.scitotenv.2020.138226>

326 Ogen, Y., 2020. Assessing nitrogen dioxide (NO<sub>2</sub>) levels as a contributing factor to coronavirus (COVID-19) fatality.  
327 Sci. Total Environ. 726, 138605. <https://doi.org/10.1016/j.scitotenv.2020.138605>

328 QGIS, 2020. QGIS Development Team. QGIS Geographic Information System. Open Source Geospatial Foundation  
329 Project.

330 Riccardo, F., Ajelli, M., Andrianou, X.D., Dstat, A.B., Manso, M. Del, Fabiani, M., Bellino, S., Boros, S., Urdiales,  
331 A.M., Marziano, V., Rota, M.C., Filia, A., Ancona, F.P.D., Siddu, A., Punzo, O., Trentini, F., Guzzetta, G.,  
332 Poletti, P., Stefanelli, P., Castrucci, M.R., Ciervo, A., Benedetto, C. Di, Tallon, M., Piccioli, A., Rezza, G.,  
333 Merler, S., Pezzotti, P., 2020. Epidemiological characteristics of COVID-19 cases in Italy and estimates of the  
334 reproductive numbers one month into the epidemic. medRxiv.  
335 <https://doi.org/https://doi.org/10.1101/2020.04.08.20056861>

336 Sanità di Toppi, L., Sanità di Toppi, L., Bellini, E., 2020. Novel Coronavirus: How Atmospheric Particulate Affects Our  
337 Environment and Health. Challenges 11, 6. <https://doi.org/10.3390/challe11010006>

338 Setti, L., Passarini, F., De Gennaro, G., Barbieri, P., Perrone, M.G., Borelli, M., Palmisani, J., Di Gilio, A., Torboli, V.,  
339 Fontana, F., Clemente, L., Pallavicini, A., Ruscio, M., Piscitelli, P., Miani, A., 2020a. SARS-Cov-2RNA Found  
340 on Particulate Matter of Bergamo in Northern Italy: First Evidence. Environ. Res. 109754.  
341 <https://doi.org/10.1016/j.envres.2020.109754>

342 Setti, L., Passarini, F., Gennaro, G. De, Barbieri, P., Perrone, M.G., Piazzalunga, A., Borelli, M., Palmisani, J., Gilio, A.  
343 Di, PISCITELLI, P., Miani, A., 2020b. The Potential role of Particulate Matter in the Spreading of COVID-19 in  
344 Northern Italy: First Evidence-based Research Hypotheses. medRxiv 2020.04.11.20061713.  
345 <https://doi.org/10.1101/2020.04.11.20061713>

346 SIMA, 2020. Position paper - Evaluation of the potential relationship between Particulate Matter (PM) pollution and  
347 COVID-19 infection spread in Italy [WWW Document].

348 Xu, Q., Li, X., Wang, S., Wang, C., Huang, F., Gao, Q., Wu, L., Tao, L., Guo, J., Wang, W., Guo, X., 2016. Fine  
349 particulate air pollution and hospital emergency room visits for respiratory disease in urban areas in Beijing,  
350 China, in 2013. PLoS One 11, 1–17. <https://doi.org/10.1371/journal.pone.0153099>

351 Yari, S., Moshammer, H., 2020. The Effect of Ambient Air Pollution on Severity of COVID19: Hospitalisation and  
352 Death. Asian Pacific J. Environ. Cancer 3, 15–16. <https://doi.org/10.31557/apjec.2020.3.1.15-16>

- 353 Zhou, M., He, G., Fan, M., Wang, Z., Liu, Yang, Ma, J., Ma, Z., Liu, J., Liu, Yunning, Wang, L., Liu, Yuanli, 2015.
- 354 Smog episodes, fine particulate pollution and mortality in China. *Environ. Res.* 136, 396–404.
- 355 <https://doi.org/10.1016/j.envres.2014.09.038>
- 356 Zhu, Y., Xie, J., Huang, F., Cao, L., 2020. Association between short-term exposure to air pollution and COVID-19
- 357 infection: Evidence from China. *Sci. Total Environ.* 727, 138704. <https://doi.org/10.1016/j.scitotenv.2020.138704>
- 358

Preprint version

359 **Tab. 1:** Pearson and Spearman correlation for  $T_d$ ,  $PM_{10}$  and  $PM_{2.5}$ . a:  $p$ -value  $>0.05$ . b:  $p$ -value  $< 0.05$  [one-column  
360 fitting table]

|            |          | $T_d$               | $PM_{10}$           | $PM_{2.5}$ |
|------------|----------|---------------------|---------------------|------------|
| $T_d$      | Pearson  | 1                   |                     |            |
|            | Spearman | 1                   |                     |            |
| $PM_{10}$  | Pearson  | 0.2485 <sup>a</sup> | 1                   |            |
|            | Spearman | 0.1954 <sup>a</sup> | 1                   |            |
| $PM_{2.5}$ | Pearson  | 0.2995 <sup>a</sup> | 0.8993 <sup>b</sup> | 1          |
|            | Spearman | 0.2933 <sup>b</sup> | 0.8669 <sup>b</sup> | 1          |

361

362

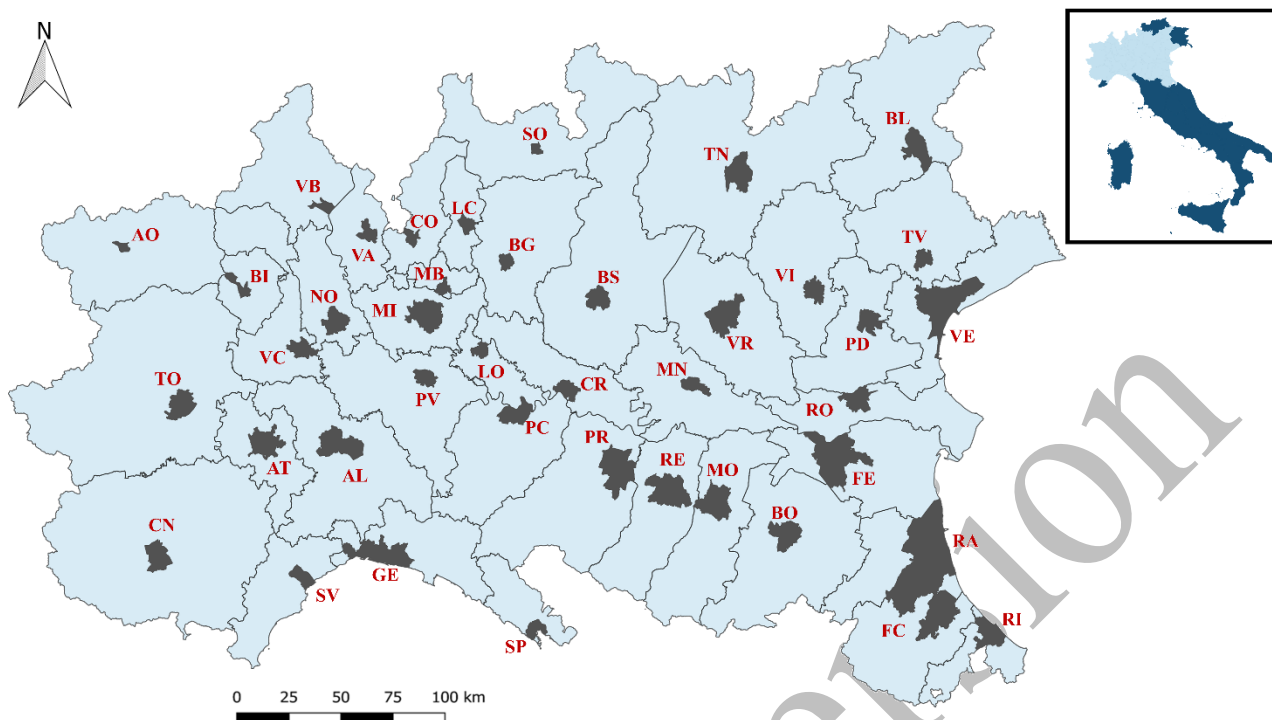

363

364 **Fig. 1:** Map of the area analysed in the study and its location in Italy. The capital city for each province is highlighted.

365 Map realized with QGIS (2020). AL: Alessandria; AO: Aosta; AT: Asti; BG: Bergamo; BI: Biella; BL: Belluno; BO:

366 Bologna; BS: Brescia; CN: Cuneo; CO: Como; CR: Cremona; FC: Forlì and Cesena; FE: Ferrara; GE: Genoa; LC:

367 Lecco; LO: Lodi; MB: Monza; MI: Milan; MN: Mantova; MO: Modena; NO: Novara; PC: Piacenza; PD: Padua; PR:

368 Parma; PV: Pavia; RA: Ravenna; RE: Reggio Emilia; RI: Rimini; RO: Rovigo; SO: Sondrio; SP: La Spezia; SV:

369 Savona; TN: Trento; TO: Turin; TV: Treviso; VA: Varese; VB: Verbania; VC: Vercelli; VE: Venice; VI: Vicenza; VR:

370 Verona. [two-column fitting image]



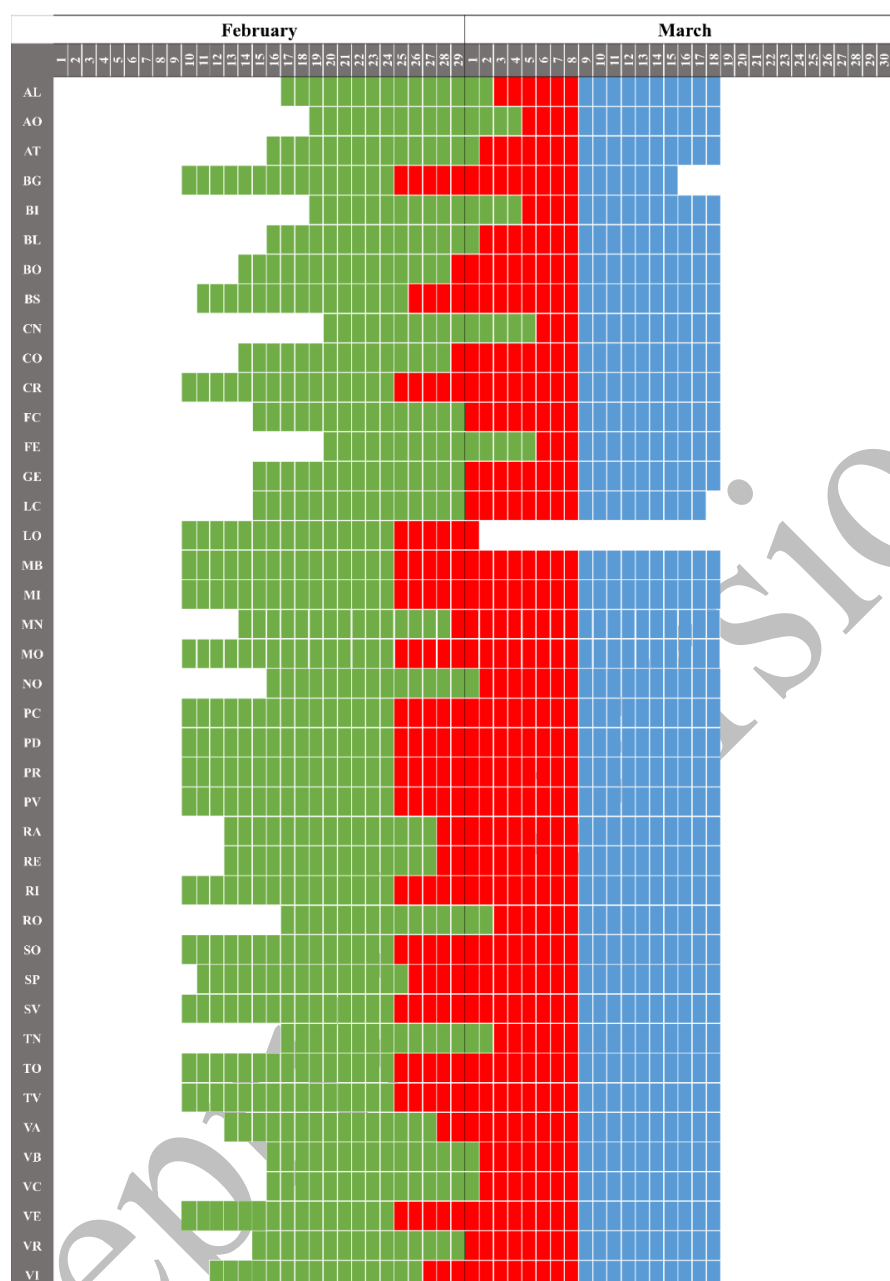

**Fig. 2:** Selected periods for air quality monitoring (green) and epidemiological data (blue) collection. In the periods highlights in red both types of data have been studied. AL: Alessandria; AO: Aosta; AT: Asti; BG: Bergamo; BI: Biella; BL: Belluno; BO: Bologna; BS: Brescia; CN: Cuneo; CO: Como; CR: Cremona; FC: Forlì and Cesena; FE: Ferrara; GE: Genoa; LC: Lecco; LO: Lodi; MB: Monza; MI: Milan; MN: Mantova; MO: Modena; NO: Novara; PC: Piacenza; PD: Padua; PR: Parma; PV: Pavia; RA: Ravenna; RE: Reggio Emilia; RI: Rimini; RO: Rovigo; SO: Sondrio; SP: La Spezia; SV: Savona; TN: Trento; TO: Turin; TV: Treviso; VA: Varese; VB: Verbania; VC: Vercelli; VE: Venice; VI: Vicenza; VR: Verona. (For interpretation of the references to colour in this figure, the reader is referred to the Web version of this article). [two-column fitting image]

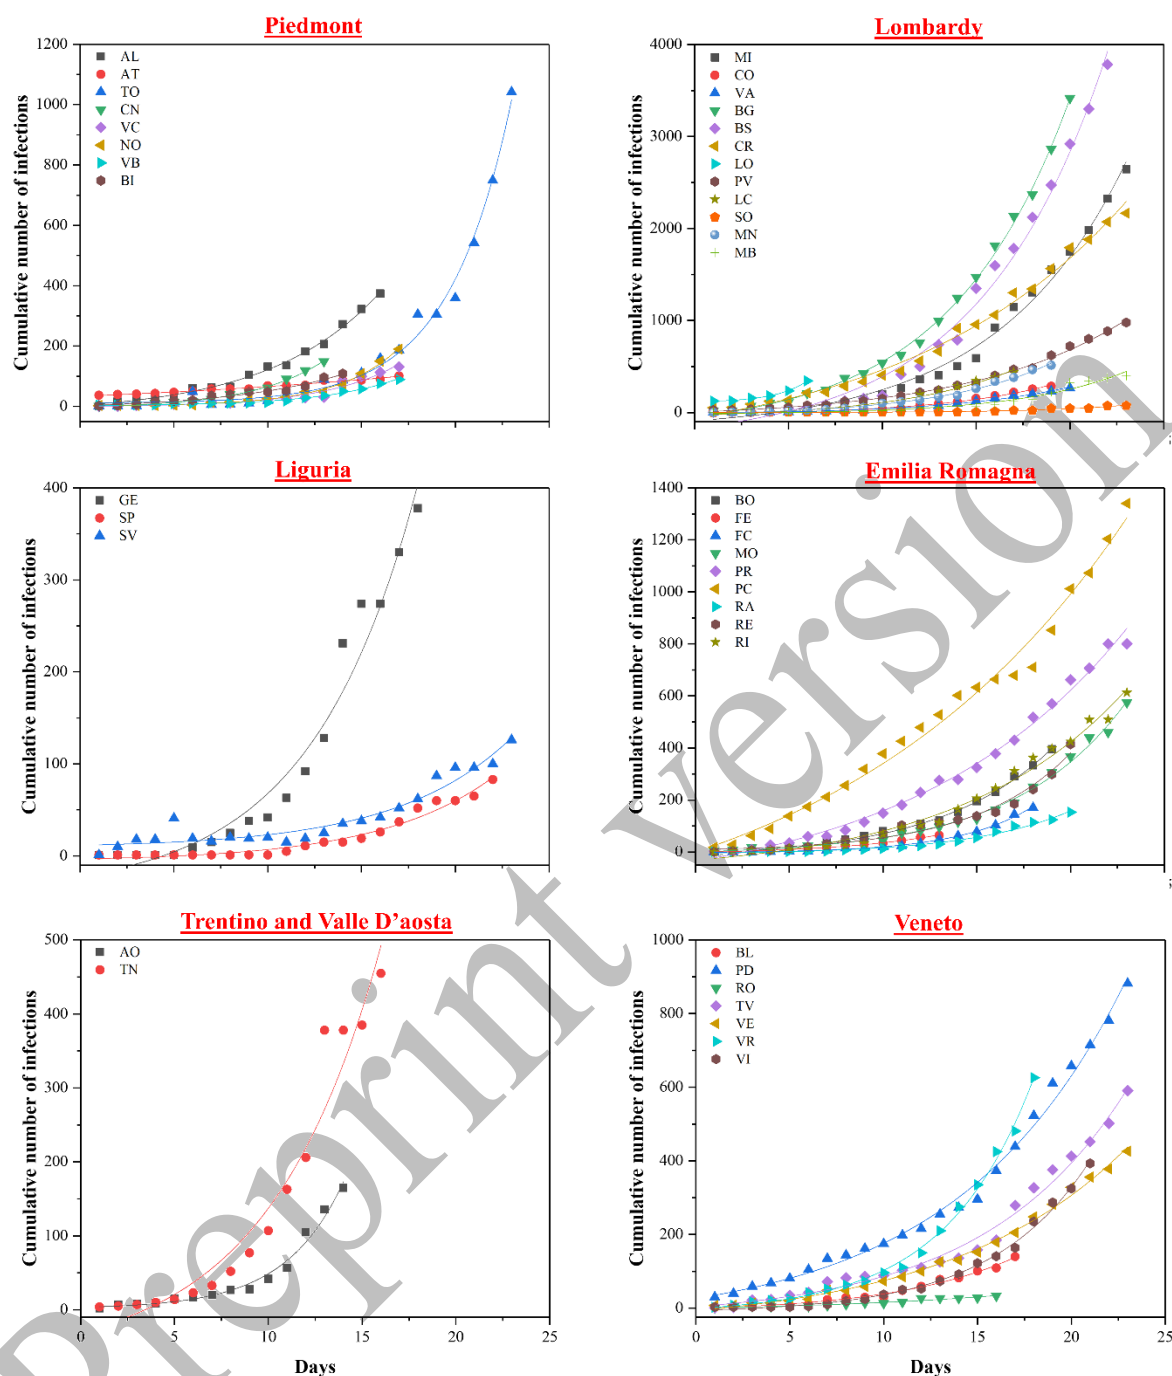

**Fig. 2:** Epidemiological data and exponential fitted curves. AL: Alessandria; AO: Aosta; AT: Asti; BG: Bergamo; BI: Biella; BL: Belluno; BO: Bologna; BS: Brescia; CN: Cuneo; CO: Como; CR: Cremona; FC: Forlì and Cesena; FE: Ferrara; GE: Genoa; LC: Lecco; LO: Lodi; MB: Monza; MI: Milan; MN: Mantova; MO: Modena; NO: Novara; PC: Piacenza; PD: Padua; PR: Parma; PV: Pavia; RA: Ravenna; RE: Reggio Emilia; RI: Rimini; RO: Rovigo; SO: Sondrio; SP: La Spezia; SV: Savona; TN: Trento; TO: Turin; TV: Treviso; VA: Varese; VB: Verbania; VC: Vercelli; VE: Venice; VI: Vicenza; VR: Verona. (For interpretation of the references to colour in this figure, the reader is referred to the Web version of this article). [two-column fitting image]

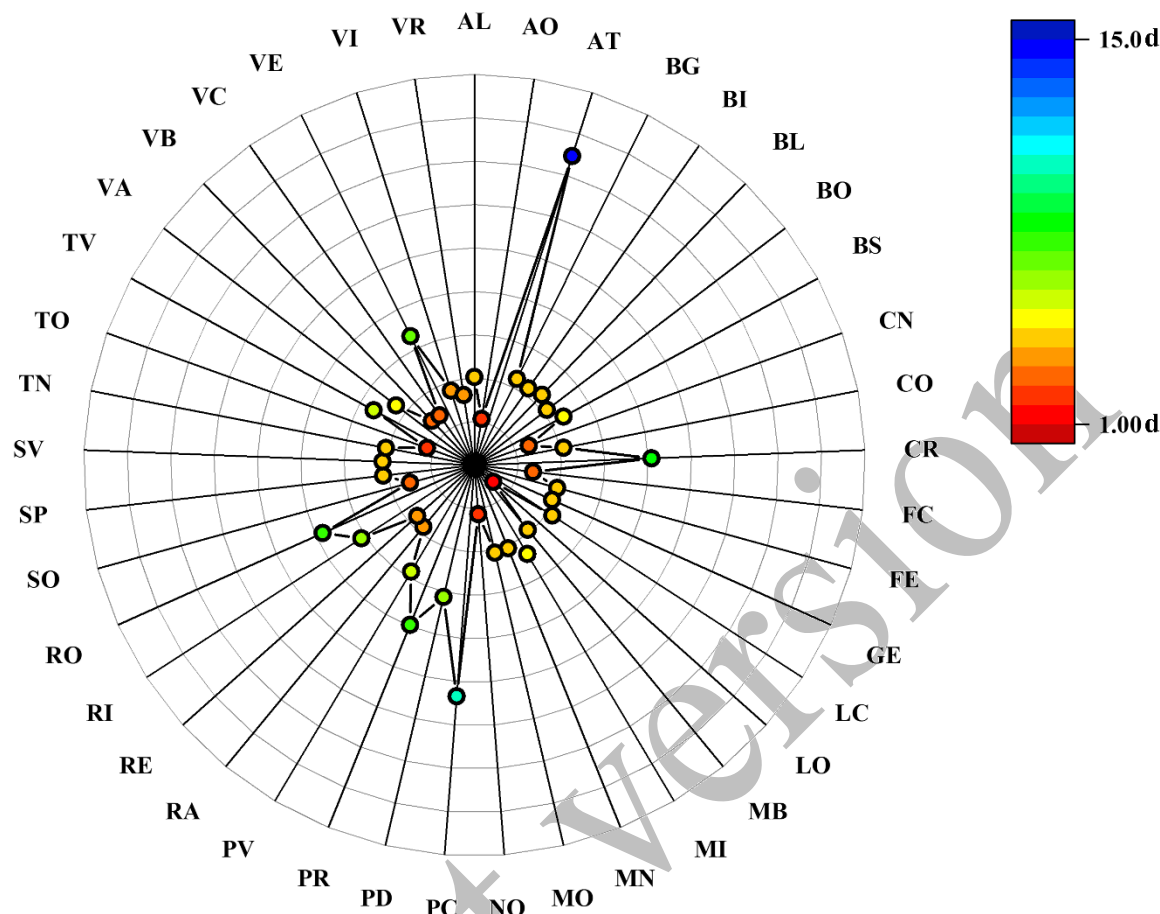

**Fig. 4:** Value of doubling time ( $T_d$ ) for each city. AL: Alessandria; AO: Aosta; AT: Asti; BG: Bergamo; BI: Biella; BL: Belluno; BO: Bologna; BS: Brescia; CN: Cuneo; CO: Como; CR: Cremona; FC: Forlì and Cesena; FE: Ferrara; GE: Genoa; LC: Lecco; LO: Lodi; MB: Monza; MI: Milan; MN: Mantova; MO: Modena; NO: Novara; PC: Piacenza; PD: Padua; PR: Parma; PV: Pavia; RA: Ravenna; RE: Reggio Emilia; RI: Rimini; RO: Rovigo; SO: Sondrio; SP: La Spezia; SV: Savona; TN: Trento; TO: Turin; TV: Treviso; VA: Varese; VB: Verbania; VC: Vercelli; VE: Venice; VI: Vicenza; VR: Verona. (For interpretation of the references to colour in this figure, the reader is referred to the Web version of this article). [two-column fitting image]

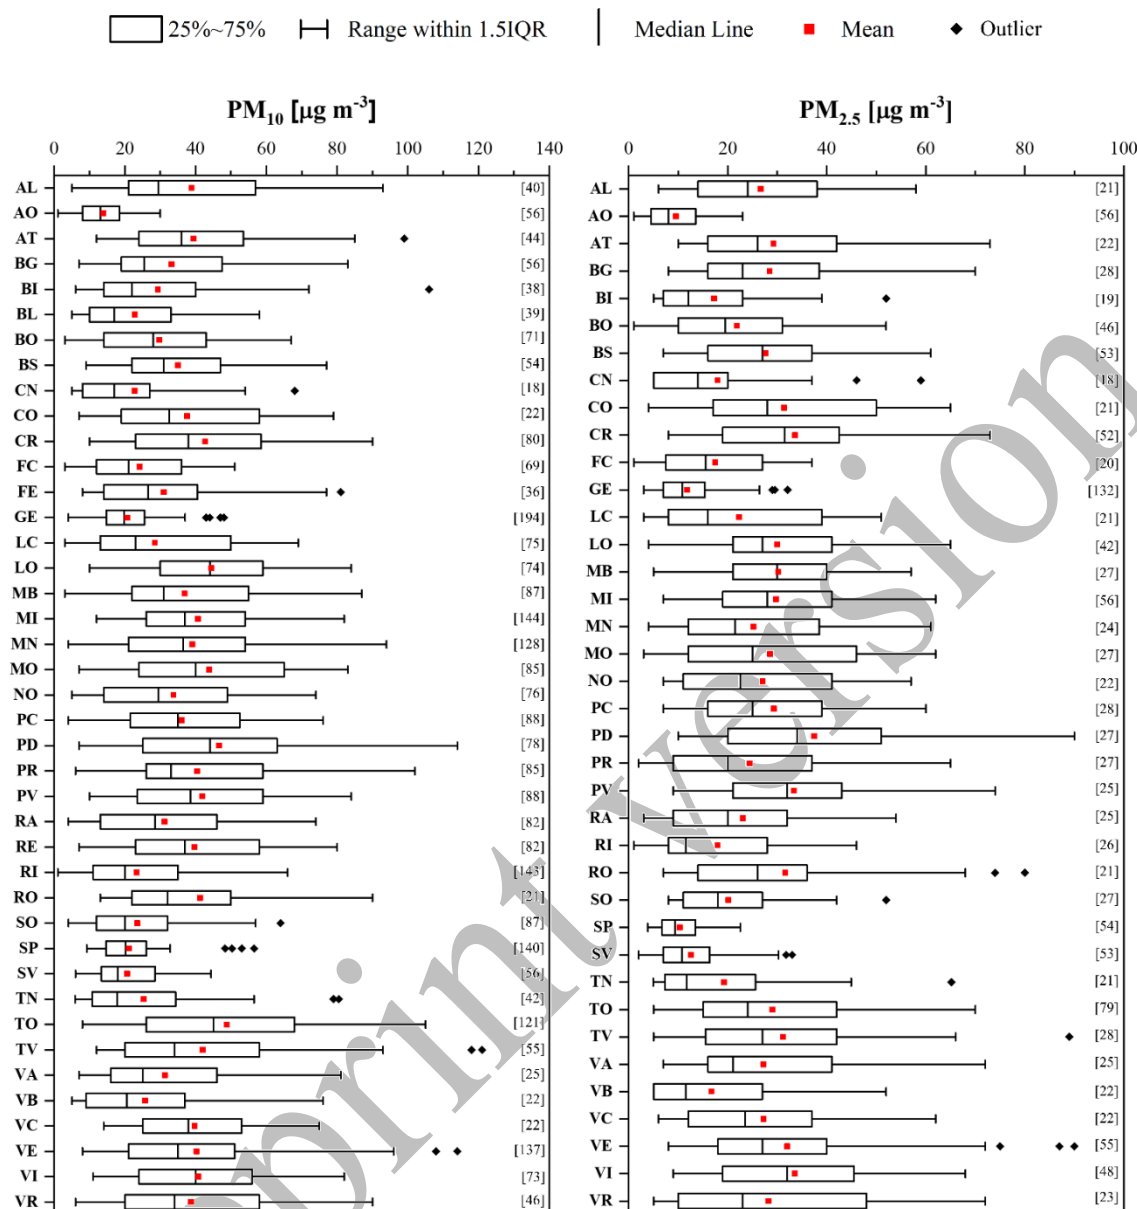

**Fig. 5:** PM<sub>10</sub> and PM<sub>2.5</sub> concentration during air quality monitoring period for each city. In brackets, numbers of data are reported. Boxplots represent the distance between the first and third quartiles while whiskers are set as the most extreme (lower and upper) data point not exceeding 1.5 times the quartile range from the median. AL: Alessandria; AO: Aosta; AT: Asti; BG: Bergamo; BI: Biella; BL: Belluno; BO: Bologna; BS: Brescia; CN: Cuneo; CO: Como; CR: Cremona; FC: Forlì and Cesena; FE: Ferrara; GE: Genoa; LC: Lecco; LO: Lodi; MB: Monza; MI: Milan; MN: Mantova; MO: Modena; NO: Novara; PC: Piacenza; PD: Padua; PR: Parma; PV: Pavia; RA: Ravenna; RE: Reggio Emilia; RI: Rimini; RO: Rovigo; SO: Sondrio; SP: La Spezia; SV: Savona; TN: Trento; TO: Turin; TV: Treviso; VA: Varese; VB: Verbania; VC: Vercelli; VE: Venice; VI: Vicenza; VR: Verona. [two-column fitting image]

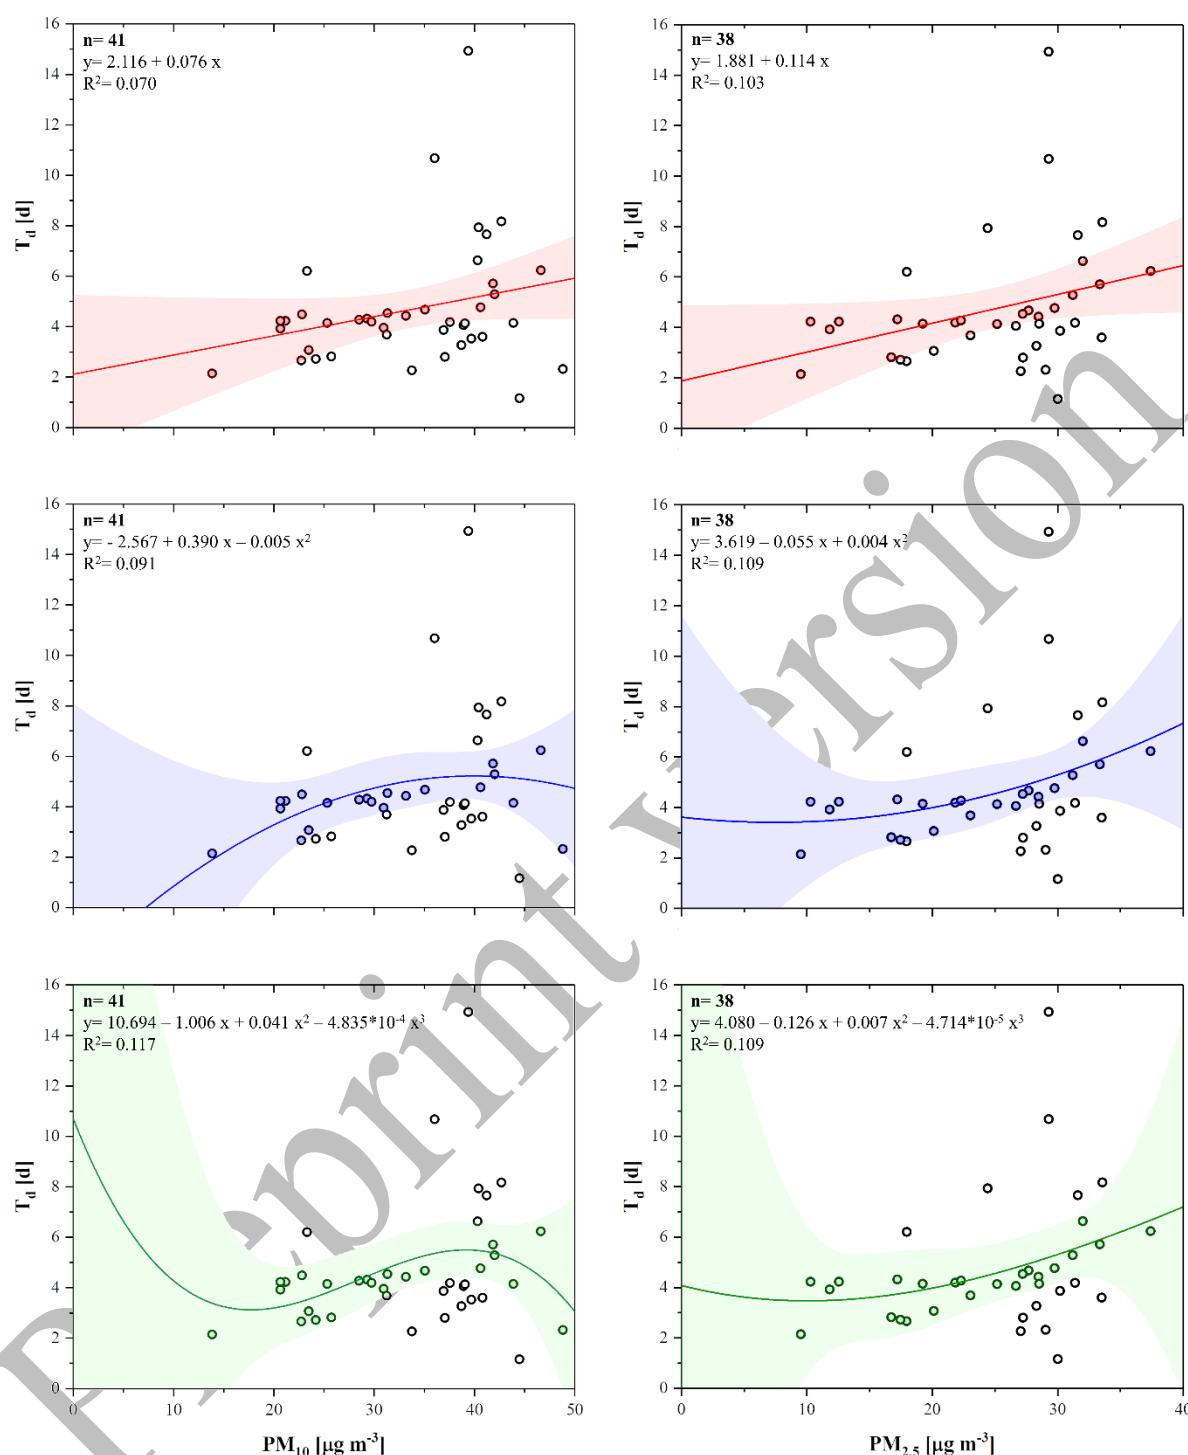

**Fig. 6:** Fitting of  $T_d$  with  $PM_{10}$  and  $PM_{2.5}$  with linear (red), parabolic (blue) and cubic (green) functions. The coloured bands represent the 95% confidence interval.  $n$ : number of data. (For interpretation of the references to colour in this figure, the reader is referred to the Web version of this article). [double-column fitting table]

**Table S1:** Number of air quality control units for  $PM_{10}$  and  $PM_{2.5}$  analysed in the study. a: Forlì and Cesena, co-capitals of their province, have been considered as a single city; b: The data refer to the air quality control unit located in Domodossola.

| City                          | Abbreviation | number of air quality control units analysed |            |
|-------------------------------|--------------|----------------------------------------------|------------|
|                               |              | $PM_{10}$                                    | $PM_{2.5}$ |
| Alessandria                   | AL           | 2                                            | 1          |
| Aosta                         | AO           | 3                                            | 3          |
| Asti                          | AT           | 2                                            | 1          |
| Bergamo                       | BG           | 2                                            | 1          |
| Biella                        | BI           | 2                                            | 2          |
| Belluno                       | BL           | 2                                            | 0          |
| Bologna                       | BO           | 3                                            | 2          |
| Brescia                       | BS           | 2                                            | 2          |
| Cuneo                         | CN           | 1                                            | 1          |
| Como                          | CO           | 1                                            | 1          |
| Cremona                       | CR           | 3                                            | 2          |
| Forlì and Cesena <sup>a</sup> | FC           | 3                                            | 1          |
| Ferrara                       | FE           | 2                                            | 0          |
| Genova                        | GE           | 9                                            | 6          |
| Lecco                         | LC           | 2                                            | 1          |
| Lodi                          | LO           | 2                                            | 2          |
| Monza                         | MB           | 2                                            | 1          |

|               |    |                |                |
|---------------|----|----------------|----------------|
| Milano        | MI | 4              | 2              |
| Mantova       | MN | 4              | 1              |
| Modena        | MO | 2              | 1              |
| Novara        | NO | 2              | 1              |
| Piacenza      | PC | 2              | 1              |
| Padova        | PD | 3              | 1              |
| Parma         | PR | 2              | 1              |
| Pavia         | PV | 2              | 1              |
| Ravenna       | RA | 2              | 1              |
| Reggio Emilia | RE | 2              | 0              |
| Rimini        | RI | 4              | 1              |
| Rovigo        | RO | 1              | 1              |
| Sondrio       | SO | 2              | 1              |
| La Spezia     | SP | 4              | 2              |
| Savona        | SV | 2              | 2              |
| Trento        | TN | 2              | 1              |
| Torino        | TO | 5              | 3              |
| Treviso       | TV | 2              | 1              |
| Varese        | VA | 1              | 1              |
| Verbania      | VB | 1 <sup>b</sup> | 1 <sup>b</sup> |
| Vercelli      | VC | 2              | 1              |
| Venezia       | VE | 5              | 2              |

|         |    |   |   |
|---------|----|---|---|
| Vicenza | VI | 3 | 2 |
| Verona  | VR | 2 | 1 |

Preprint version



**Table S2:** Values of parameter  $I_0$ ,  $a_1$  and  $a_2$  of the fitted curve for each city.  $n$ : number of epidemiological data used;

AL: Alessandria; AO: Aosta; AT: Asti; BG: Bergamo; BI: Biella; BL: Belluno; BO: Bologna; BS: Brescia; CN: Cuneo;

CO: Como; CR: Cremona; FC: Forlì and Cesena; FE: Ferrara; GE: Genoa; LC: Lecco; LO: Lodi; MB: Monza; MI:

Milan; MN: Mantova; MO: Modena; NO: Novara; PC: Piacenza; PD: Padua; PR: Parma; PV: Pavia; RA: Ravenna;

RE: Reggio Emilia; RI: Rimini; RO: Rovigo; SO: Sondrio; SP: La Spezia; SV: Savona; TN: Trento; TO: Turin; TV:

Treviso; VA: Varese; VB: Verbania; VC: Vercelli; VE: Venice; VI: Vicenza; VR: Verona.

|    | $I_0$    |                | $a_1$    |                | $a_2$    |                | Statistics      |         |            | $n$   |
|----|----------|----------------|----------|----------------|----------|----------------|-----------------|---------|------------|-------|
|    | Value    | Standard Error | Value    | Standard Error | Value    | Standard Error | Reduced Chi-Sqr | $R^2$   | Adj. $R^2$ | Value |
| AL | -22.7858 | 9.56625        | 26.19837 | 5.03171        | 5.85865  | 0.38588        | 75.97882        | 0.99504 | 0.99427    | 16    |
| AO | 1.71263  | 4.29319        | 1.8668   | 0.83855        | 3.09808  | 0.30763        | 53.16056        | 0.98344 | 0.98043    | 14    |
| AT | -21.7287 | 35.72876       | 55.13212 | 33.69611       | 21.54214 | 9.00583        | 11.14741        | 0.97627 | 0.97288    | 17    |
| BG | -203.838 | 35.39495       | 158.0004 | 15.60995       | 6.38705  | 0.19475        | 2007.19414      | 0.99831 | 0.99811    | 20    |
| BI | -10.3079 | 10.53521       | 12.37323 | 6.7235         | 6.23368  | 1.34012        | 41.51329        | 0.96776 | 0.9619     | 14    |
| BL | -12.0827 | 5.40711        | 10.87774 | 2.98679        | 6.47641  | 0.62986        | 22.7202         | 0.98903 | 0.98746    | 17    |
| BO | -24.3799 | 5.02768        | 18.29187 | 2.20301        | 6.05196  | 0.22422        | 38.719          | 0.99764 | 0.99735    | 19    |
| BS | -327.728 | 87.59519       | 162.9651 | 36.36456       | 6.74469  | 0.44975        | 15296.66559     | 0.99051 | 0.98951    | 22    |
| CN | -6.67553 | 2.70186        | 5.35517  | 1.02009        | 3.83916  | 0.20899        | 9.38547         | 0.99659 | 0.99591    | 13    |
| CO | -25.695  | 7.22943        | 14.06432 | 3.15443        | 6.03549  | 0.41548        | 80.71223        | 0.99188 | 0.99087    | 19    |
| CR | -444.391 | 106.4128       | 388.9752 | 76.50944       | 11.78469 | 1.02075        | 4300.60973      | 0.99211 | 0.99132    | 23    |
| FC | -2.94276 | 1.60517        | 1.82318  | 0.30701        | 3.92652  | 0.14511        | 9.96144         | 0.99673 | 0.99629    | 18    |
| FE | -8.64401 | 3.00631        | 7.68614  | 1.88989        | 5.70994  | 0.5489         | 3.27702         | 0.99388 | 0.99265    | 13    |
| GE | -40.0979 | 20.25716       | 18.40972 | 8.66347        | 5.6552   | 0.80836        | 619.3506        | 0.96761 | 0.9633     | 18    |
| LC | -58.857  | 21.12615       | 33.29357 | 11.01259       | 6.16447  | 0.69497        | 407.23546       | 0.98425 | 0.982      | 17    |
| LO | 112.6962 | 7.52882        | 6.44749  | 2.38324        | 1.67774  | 0.1642         | 34.68078        | 0.99701 | 0.99502    | 6     |
| MB | -18.0619 | 12.94899       | 7.54365  | 3.34796        | 5.57771  | 0.6023         | 654.85582       | 0.96679 | 0.96347    | 23    |
| MI | -193.16  | 48.51016       | 103.1093 | 19.34726       | 6.87684  | 0.37781        | 5278.97352      | 0.99298 | 0.99228    | 23    |
| MN | -35.5755 | 10.91358       | 23.69597 | 4.67477        | 5.96483  | 0.35764        | 190.50716       | 0.99374 | 0.99296    | 19    |
| MO | -11.8609 | 7.01142        | 12.65234 | 2.13228        | 5.98176  | 0.26129        | 161.3006        | 0.99479 | 0.99427    | 23    |

|           |          |          |          |          |          |         |            |         |         |    |
|-----------|----------|----------|----------|----------|----------|---------|------------|---------|---------|----|
| <b>NO</b> | 1.05772  | 2.13991  | 1.07213  | 0.27251  | 3.27579  | 0.16221 | 21.36825   | 0.99404 | 0.99318 | 17 |
| <b>PC</b> | -373.065 | 113.1096 | 372.6174 | 92.91388 | 15.40336 | 1.98866 | 1803.72403 | 0.98904 | 0.98794 | 23 |
| <b>PD</b> | -46.9666 | 21.64301 | 73.40548 | 12.44327 | 8.99543  | 0.55457 | 455.29133  | 0.99386 | 0.99324 | 23 |
| <b>PR</b> | -173.927 | 34.89795 | 138.7576 | 24.62346 | 11.44977 | 0.87783 | 513.0932   | 0.9935  | 0.99285 | 23 |
| <b>PV</b> | -61.2791 | 16.11574 | 65.57775 | 8.37606  | 8.23669  | 0.35734 | 336.50171  | 0.99654 | 0.99619 | 23 |
| <b>RA</b> | -8.43847 | 3.45396  | 3.89253  | 1.09444  | 5.32099  | 0.39459 | 31.98398   | 0.98769 | 0.98624 | 20 |
| <b>RE</b> | 1.80809  | 10.56138 | 7.45922  | 3.03678  | 5.09053  | 0.52539 | 335.14555  | 0.97534 | 0.97243 | 20 |
| <b>RI</b> | -85.7284 | 23.86018 | 54.49339 | 13.64294 | 8.94897  | 0.81163 | 562.94886  | 0.9867  | 0.98537 | 23 |
| <b>RO</b> | -10.468  | 8.99155  | 10.48627 | 7.42367  | 11.0481  | 4.09031 | 6.98982    | 0.94737 | 0.93927 | 16 |
| <b>SO</b> | 0.1461   | 1.82642  | 0.45368  | 0.23829  | 4.43206  | 0.45637 | 21.23177   | 0.96364 | 0.96001 | 23 |
| <b>SP</b> | -5.86152 | 2.89049  | 2.48002  | 1.00254  | 6.10327  | 0.67652 | 22.08383   | 0.97105 | 0.96801 | 22 |
| <b>SV</b> | 8.74676  | 5.25446  | 2.76366  | 1.66851  | 6.10318  | 0.9723  | 85.98601   | 0.93618 | 0.9298  | 23 |
| <b>TN</b> | -68.5405 | 44.61826 | 38.7279  | 24.07553 | 5.98613  | 1.29781 | 1541.30491 | 0.9502  | 0.94254 | 16 |
| <b>TO</b> | 10.89431 | 8.37738  | 1.05146  | 0.32278  | 3.35126  | 0.15323 | 681.96806  | 0.9915  | 0.99065 | 23 |
| <b>TV</b> | -26.6831 | 15.83901 | 30.54156 | 7.42625  | 7.62375  | 0.59162 | 414.17647  | 0.98779 | 0.98656 | 23 |
| <b>VA</b> | -22.8631 | 7.72903  | 14.17442 | 3.53634  | 6.5454   | 0.51432 | 88.87846   | 0.9892  | 0.98793 | 20 |
| <b>VB</b> | 1.62903  | 1.69677  | 1.39914  | 0.41722  | 4.07234  | 0.2903  | 8.48801    | 0.98965 | 0.98817 | 17 |
| <b>VC</b> | -1.67723 | 5.38567  | 2.11354  | 1.29882  | 4.0414   | 0.58956 | 87.07359   | 0.95775 | 0.95171 | 17 |
| <b>VE</b> | -50.8635 | 10.09588 | 44.12839 | 6.16946  | 9.56299  | 0.50902 | 80.64094   | 0.99582 | 0.9954  | 23 |
| <b>VI</b> | -13.4788 | 4.33654  | 7.28041  | 1.1698   | 5.19408  | 0.20637 | 63.79283   | 0.99592 | 0.99547 | 21 |
| <b>VR</b> | -14.7726 | 7.51136  | 14.06908 | 2.28671  | 4.71441  | 0.19884 | 141.37564  | 0.99641 | 0.99593 | 18 |
